# Supplementary material
Source: publisher figshare collection journal article supplement (https://tandf.figshare.com/ndownloader/files/22907819)
Supplement: Supplementary file 1 [file 22907819]

## Sheet: OPX-Raw
No.	SiO2	TiO2	Al2O3	Cr2O3	FeO	MnO	MgO	NiO	CaO	Na2O	K2O	Total	Comment
277	50.171	0.458	7.823	0.867	4.653	0.117	17.062	0.015	17.266	0.779	0.005	99.216	Cr-Aug_1
No.	SiO2	TiO2	Al2O3	Cr2O3	FeO	MnO	MgO	NiO	CaO	Na2O	K2O	Total	Comment
278	55.164	0.088	3.726	0.437	6.766	0.152	31.889	0.054	0.875	0.077	0	99.228	OPX_Tai_3_1	Peridotite
279	54.594	0.106	2.952	0.348	6.711	0.192	32.385	0.054	0.872	0.119	0.002	98.335	OPX_Tai_3_2	Peridotite
280	54.499	0.089	4.039	0.495	6.755	0.18	32.078	0.048	0.888	0.11	0	99.181	OPX_Tai_3_3	Peridotite
281	55.185	0.096	3.233	0.466	6.759	0.161	32.24	0.083	0.829	0.093	0	99.145	OPX_Tai_3_4	Peridotite
282	54.227	0.053	4.323	0.517	6.514	0.136	31.95	0.118	0.768	0.106	0.005	98.717	OPX_Tai_3_5	Peridotite
283	54.665	0.054	4.282	0.456	6.495	0.17	31.917	0.115	0.802	0.099	0.002	99.057	OPX_Tai_3_6	Peridotite
284	54.813	0.057	4.601	0.48	6.245	0.156	31.938	0.066	0.822	0.103	0	99.281	OPX_Tai_3_7	Peridotite
285	55.112	0.007	4.392	0.486	6.594	0.167	31.933	0.087	0.8	0.099	0.002	99.679	OPX_Tai_3_8	Peridotite
286	54.675	0.068	4.649	0.473	6.316	0.177	31.779	0.099	0.803	0.111	0.011	99.161	OPX_Tai_3_9	Peridotite
287	54.901	0.058	4.68	0.52	6.261	0.133	31.567	0.084	0.807	0.154	0.001	99.166	OPX_Tai_3_10	Peridotite
288	54.906	0.015	4.572	0.46	6.247	0.133	31.954	0.083	0.858	0.119	0	99.347	OPX_Tai_3_11	Peridotite
289	54.667	0.036	4.602	0.491	6.133	0.142	31.895	0.093	0.755	0.095	0	98.909	OPX_Tai_3_12	Peridotite
290	54.614	0.096	4.498	0.478	6.018	0.164	32.044	0.081	0.891	0.131	0	99.015	OPX_Tai_3_13	Peridotite
291	54.324	0.091	4.781	0.516	6.098	0.12	32.059	0.082	0.849	0.116	0	99.036	OPX_Tai_3_14	Peridotite
292	54.788	0.054	4.887	0.565	5.577	0.126	32.576	0.079	0.821	0.057	0	99.53	OPX_Tai_8_1	Peridotite
293	54.453	0.067	4.775	0.516	5.658	0.13	32.571	0.086	0.821	0.068	0.003	99.148	OPX_Tai_8_2	Peridotite
294	54.301	0.077	4.667	0.618	5.61	0.127	32.7	0.106	0.867	0.07	0.006	99.149	OPX_Tai_8_3	Peridotite
295	54.78	0.065	4.916	0.594	5.61	0.135	32.721	0.119	0.886	0.06	0.002	99.888	OPX_Tai_8_4	Peridotite
296	54.685	0.056	4.789	0.577	5.536	0.155	32.4	0.113	0.865	0.165	0	99.341	OPX_Tai_8_5	Peridotite
297	54.867	0.06	4.753	0.612	5.715	0.129	32.524	0.095	0.849	0.084	0.006	99.694	OPX_Tai_8_6	Peridotite
298	54.877	0.091	4.689	0.569	5.517	0.145	32.538	0.096	0.854	0.101	0.008	99.485	OPX_Tai_8_7	Peridotite
299	55.096	0.075	4.867	0.629	5.604	0.149	32.666	0.09	0.82	0.109	0.004	100.109	OPX_Tai_8_8	Peridotite
300	54.838	0.071	4.805	0.582	5.567	0.133	32.623	0.09	0.904	0.087	0	99.7	OPX_Tai_9_1	Peridotite
301	54.784	0.057	4.845	0.603	5.732	0.139	32.407	0.135	0.938	0.087	0.005	99.732	OPX_Tai_9_2	Peridotite
302	55.041	0.068	4.67	0.56	5.545	0.121	32.717	0.103	0.751	0.074	0	99.65	OPX_Tai_9_3	Peridotite
303	55.228	0.068	4.765	0.552	5.578	0.112	32.604	0.079	0.762	0.102	0	99.85	OPX_Tai_9_4	Peridotite
304	55.18	0.098	4.608	0.605	5.426	0.136	32.483	0.085	0.794	0.09	0.005	99.51	OPX_Tai_9_5	Peridotite
305	55.342	0.049	4.441	0.545	5.675	0.133	32.486	0.107	0.758	0.107	0	99.643	OPX_Tai_9_6	Peridotite
316	55.173	0.109	4.654	0.392	6.244	0.159	32.599	0.096	0.632	0.132	0	100.19	OPX_Sanri_1	Peridotite
317	55.35	0.086	4.341	0.379	6.414	0.126	32.698	0.095	0.711	0.159	0.003	100.362	OPX_Sanri_2	Peridotite
318	55.561	0.1	4.351	0.355	6.454	0.142	33.008	0.08	0.571	0.107	0.005	100.734	OPX_Sanri_3	Peridotite
319	55.385	0.095	4.197	0.367	6.247	0.136	32.715	0.104	0.647	0.134	0	100.027	OPX_Sanri_4	Peridotite
320	55.337	0.105	4.484	0.369	6.358	0.129	32.629	0.088	0.7	0.138	0.003	100.34	OPX_Sanri_5	Peridotite
321	55.023	0.095	4.486	0.367	6.47	0.166	32.662	0.077	0.66	0.143	0.004	100.153	OPX_Sanri_6	Peridotite
No.	SiO2	TiO2	Al2O3	Cr2O3	FeO	MnO	MgO	NiO	CaO	Na2O	K2O	Total	Comment
277	50.484	0.461	7.903	0.962	4.649	0.117	16.821	0.047	17.297	0.803	0.001	99.545	Cr-Aug-1
277	50.658	0.442	7.855	0.898	4.623	0.146	17.193	0.046	17.331	0.818	0	100.01	Cr-Aug-1
No.	SiO2	TiO2	Al2O3	Cr2O3	FeO	MnO	MgO	NiO	CaO	Na2O	K2O	Total	Comment
278	57.664	0.008	1.4	0.375	5.243	0.137	35.246	0.076	0.571	0.038	0.001	100.759	OPx_Puk_1	Peridotite
279	57.602	0.008	1.378	0.417	5.143	0.114	35.331	0.082	0.629	0.013	0	100.717	OPx_Puk_2	Peridotite
280	57.681	0	1.443	0.447	5.078	0.167	35.2	0.095	0.623	0.03	0.008	100.772	OPx_Puk_3	Peridotite
281	57.789	0	1.408	0.463	5.165	0.147	35.245	0.098	0.637	0.011	0.006	100.969	OPx_Puk_4	Peridotite
282	58.189	0	1.388	0.366	5.158	0.136	35.259	0.075	0.588	0.008	0.001	101.168	OPx_Puk_5	Peridotite
283	57.648	0	1.397	0.335	5.188	0.116	35.495	0.123	0.564	0.022	0.002	100.89	OPx_Puk_6	Peridotite
284	57.812	0	1.376	0.396	5.145	0.107	35.014	0.092	0.65	0.032	0	100.624	OPx_Puk_7	Peridotite
285	57.822	0.007	1.371	0.456	5.212	0.173	35.135	0.113	0.605	0.014	0.003	100.911	OPx_Puk_8	Peridotite
286	57.577	0.004	1.39	0.406	5.2	0.131	35.385	0.132	0.614	0.043	0.001	100.883	OPx_Puk_9	Peridotite
287	57.356	0	1.367	0.445	5.072	0.141	35.114	0.089	0.633	0.031	0.006	100.254	OPx_Puk_10	Peridotite
288	57.781	0	1.407	0.375	5.282	0.119	35.206	0.119	0.594	0.016	0	100.899	OPx_Puk_11	Peridotite
289	58.016	0.013	1.421	0.47	5.254	0.12	35.451	0.092	0.63	0.033	0.003	101.503	OPx_Puk_12	Peridotite
290	58.027	0.016	1.409	0.413	5.153	0.116	35.265	0.056	0.655	0.021	0	101.131	OPx_Puk_13	Peridotite
291	57.771	0	1.476	0.399	5.138	0.126	35.25	0.041	0.658	0.014	0	100.873	OPx_Puk_14	Peridotite
292	57.88	0	1.136	0.474	5.766	0.138	34.628	0.082	0.865	0.077	0	101.046	OPx_TK_1	Peridotite
293	58.24	0	1.105	0.439	5.733	0.125	34.653	0.095	0.881	0.084	0.009	101.364	OPx_TK_2	Peridotite
301	57.674	0	1.057	0.467	5.485	0.138	34.429	0.11	0.898	0.072	0.004	100.334	OPx_TK_10	Peridotite
302	54.44	0.204	3.419	0.418	9.593	0.17	29.516	0.084	1.803	0.121	0	99.768	OPx_SK_1	Peridotite
303	54.371	0.238	3.687	0.411	9.352	0.161	29.758	0.127	1.702	0.116	0.001	99.924	OPx_SK_2	Peridotite
304	54.206	0.241	3.648	0.386	9.433	0.186	29.726	0.113	1.759	0.142	0	99.84	OPx_SK_3	Peridotite
305	54.494	0.245	3.76	0.394	8.995	0.178	29.925	0.099	1.699	0.141	0.007	99.937	OPx_SK_4	Peridotite
306	54.378	0.221	3.782	0.398	9.258	0.153	29.969	0.07	1.75	0.128	0	100.107	OPx_SK_5	Peridotite
307	54.347	0.253	3.728	0.391	9.085	0.197	29.83	0.154	1.728	0.115	0.009	99.837	OPx_SK_6	Peridotite
308	54.481	0.232	3.877	0.415	8.962	0.143	29.706	0.103	1.95	0.147	0	100.016	OPx_SK_7	Peridotite
309	54.51	0.271	3.901	0.41	8.893	0.161	29.91	0.105	1.834	0.096	0.011	100.102	OPx_SK_8	Peridotite
310	54.477	0.265	3.892	0.401	8.921	0.13	29.729	0.13	1.847	0.11	0.002	99.904	OPx_SK_9	Peridotite
311	54.73	0.244	3.807	0.396	9.027	0.164	30.092	0.126	1.794	0.125	0.01	100.515	OPx_SK_10	Peridotite
312	53.968	0.267	3.933	0.411	8.999	0.183	29.778	0.135	1.907	0.135	0	99.716	OPx_SK_11	Peridotite

## Sheet: CPX-Raw
No.	SiO2	TiO2	Al2O3	Cr2O3	FeO	MnO	MgO	NiO	CaO	Na2O	K2O	Total	Comment
322	50.799	0.52	7.871	0.907	4.576	0.132	17.195	0.038	17.323	0.805	0.013	100.179	Cr-Aug_2
No.	SiO2	TiO2	Al2O3	Cr2O3	FeO	MnO	MgO	NiO	CaO	Na2O	K2O	Total	Comment
323	51.257	0.339	6.456	0.967	3.233	0.098	14.96	0.046	19.353	1.87	0.001	98.58	CPx_Tai3_1	Peridotite
324	51.66	0.33	6.565	1.025	3.136	0.145	15.009	0.05	19.269	1.954	0	99.143	CPx_Tai3_2	Peridotite
325	51.738	0.295	6.652	1.021	3.089	0.099	15.199	0.035	19.395	1.786	0.001	99.31	CPx_Tai3_3	Peridotite
326	51.88	0.239	6.653	1.058	2.961	0.103	15.33	0.017	19.624	1.813	0.004	99.682	CPx_Tai3_4	Peridotite
327	51.899	0.234	6.751	1.075	2.879	0.071	14.951	0.052	19.719	1.796	0.001	99.428	CPx_Tai3_5	Peridotite
328	52.073	0.277	6.699	1.067	3.086	0.1	15.067	0.027	19.613	1.805	0.001	99.815	CPx_Tai3_6	Peridotite
329	51.839	0.281	6.804	1.081	2.93	0.077	15.109	0.049	19.441	1.867	0	99.478	CPx_Tai3_7	Peridotite
330	52.012	0.244	6.819	1.036	3.003	0.107	15.068	0.078	19.36	1.864	0	99.591	CPx_Tai3_8	Peridotite
331	52.23	0.254	6.807	1.081	2.898	0.08	15.002	0.031	19.775	1.72	0.005	99.883	CPx_Tai3_9	Peridotite
332	52.134	0.295	6.842	1.106	2.856	0.098	15.061	0.067	19.781	1.703	0	99.943	CPx_Tai3_10	Peridotite
333	52.076	0.275	6.951	1.103	2.792	0.074	15.096	0.046	19.532	1.727	0.005	99.677	CPx_Tai3_11	Peridotite
334	52.469	0.26	6.585	0.986	2.735	0.061	15.111	0.015	19.796	1.688	0.006	99.712	CPx_Tai3_12	Peridotite
335	51.866	0.286	6.203	0.979	2.529	0.073	15.754	0.046	20.739	1.175	0.001	99.651	CPx_Tai3_13	Peridotite
336	52.02	0.223	6.143	1.04	2.448	0.07	15.787	0.04	20.543	1.167	0.001	99.482	CPx_Tai3_14	Peridotite
337	52.332	0.25	6.101	1.049	2.485	0.1	15.859	0.03	20.655	1.182	0	100.043	CPx_Tai3_15	Peridotite
338	52.227	0.229	6.188	0.931	2.472	0.087	15.792	0.063	20.617	1.242	0	99.848	CPx_Tai3_16	Peridotite
339	52.481	0.257	6.107	1.028	2.452	0.118	15.926	0.008	20.87	1.22	0.001	100.468	CPx_Tai3_17	Peridotite
340	52.49	0.259	6.243	1.12	2.512	0.071	15.789	0.057	20.72	1.22	0	100.481	CPx_Tai3_18	Peridotite
341	52.611	0.245	6.287	1.056	2.573	0.095	15.785	0.062	20.847	1.258	0.001	100.82	CPx_Tai3_19	Peridotite
342	52.462	0.248	6.217	1.111	2.563	0.056	15.679	0.042	20.813	1.237	0.004	100.432	CPx_Tai3_20	Peridotite
343	51.856	0.255	6.379	1.193	2.465	0.076	15.761	0.027	20.361	1.264	0.007	99.644	CPx_Tai9_1	Peridotite
344	52.11	0.258	6.013	1.108	2.359	0.097	15.831	0.034	20.85	1.233	0.006	99.899	CPx_Tai9_2	Peridotite
345	51.573	0.268	6.23	1.144	2.378	0.103	15.483	0.056	20.736	1.245	0	99.216	CPx_Tai9_3	Peridotite
346	52.034	0.266	6.161	1.028	2.468	0.103	15.759	0.058	20.763	1.263	0.008	99.911	CPx_Tai9_4	Peridotite
347	52.389	0.262	6.098	1.084	2.287	0.083	15.686	0.037	20.676	1.243	0	99.845	CPx_Tai9_5	Peridotite
348	52.445	0.279	5.941	1.06	2.371	0.087	15.888	0.057	20.877	1.267	0	100.272	CPx_Tai9_6	Peridotite
349	51.95	0.4	6.911	0.947	2.683	0.032	15.045	0.013	20.601	1.518	0	100.1	CPx_Sanri_1	Peridotite
350	52.584	0.375	6.173	0.819	2.793	0.105	15.446	0.057	20.639	1.42	0	100.411	CPx_Sanri_2	Peridotite
351	51.837	0.423	7.179	0.954	2.827	0.074	14.854	0.016	20.507	1.649	0	100.32	CPx_Sanri_3	Peridotite
352	52.47	0.44	6.845	0.954	2.911	0.103	15.175	0.032	20.697	1.476	0.002	101.105	CPx_Sanri_4	Peridotite
353	52.539	0.402	6.333	0.836	2.777	0.06	15.319	0.031	20.552	1.433	0.004	100.286	CPx_Sanri_5	Peridotite
354	52.571	0.477	6.36	0.837	2.953	0.075	15.38	0.063	20.829	1.415	0.003	100.963	CPx_Sanri_6	Peridotite
355	52.59	0.455	6.408	0.885	2.651	0.064	15.379	0	20.816	1.405	0	100.653	CPx_Sanri_7	Peridotite
356	52.687	0.457	6.426	0.858	2.923	0.111	15.373	0.051	20.859	1.432	0	101.177	CPx_Sanri_8	Peridotite
357	53.15	0.389	5.964	0.751	2.827	0.087	15.596	0.053	20.758	1.441	0	101.016	CPx_Sanri_9	Peridotite
358	52.601	0.433	6.208	0.794	2.853	0.094	15.411	0.044	20.626	1.37	0.004	100.438	CPx_Sanri_10	Peridotite
No.	SiO2	TiO2	Al2O3	Cr2O3	FeO	MnO	MgO	NiO	CaO	Na2O	K2O	Total	Comment
314	50.596	0.438	7.846	0.882	4.757	0.12	17.438	0.064	17.456	0.799	0	100.396	Cr-Aug-1
No.	SiO2	TiO2	Al2O3	Cr2O3	FeO	MnO	MgO	NiO	CaO	Na2O	K2O	Total	Comment
315	55.221	0	0.687	0.237	1.561	0.064	18.092	0.03	25.096	0.059	0	101.047	CPx_Puk_1-Aug-2	Peridotite
316	55.116	0.002	0.684	0.215	1.494	0.081	18.329	0.031	25.218	0.038	0	101.208	CPx_Puk_1-Aug-3	Peridotite
317	54.704	0	0.655	0.214	1.672	0.086	18.329	0.046	24.966	0.057	0	100.729	CPx_Puk_1-Aug-4	Peridotite
318	54.932	0	0.706	0.309	1.43	0.052	18.2	0.031	25.159	0.054	0	100.873	CPx_Puk_1-Aug-5	Peridotite
319	54.62	0	0.638	0.211	1.481	0.063	18.461	0.028	25.076	0.043	0	100.621	CPx_Puk_1-Aug-6	Peridotite
320	54.545	0	0.642	0.177	1.635	0.033	18.407	0.043	24.897	0.06	0	100.439	CPx_Puk_1-Aug-7	Peridotite
321	53.491	0.014	0.659	0.249	1.538	0.092	18.402	0.034	25.113	0.09	0	99.682	CPx_Puk_1-Aug-8	Peridotite
322	55.767	0.031	0.692	0.282	1.542	0.084	18.219	0.052	25.146	0.069	0	101.884	CPx_Puk_1-Aug-9	Peridotite
323	55.63	0	0.674	0.237	1.52	0.062	18.371	0.08	25.129	0.046	0.002	101.751	CPx_Puk_1-Aug-10	Peridotite
324	55.268	0.015	1.383	0.46	2.035	0.092	18.088	0.043	23.303	0.414	0.003	101.104	CPx_Puk_1-Aug-11	Peridotite
325	55.112	0.006	1.525	0.626	2.003	0.062	18.135	0.04	23.436	0.447	0.004	101.396	CPx_Puk_1-Aug-12	Peridotite
326	55.028	0.028	1.611	0.711	2.149	0.057	18.225	0.082	23.084	0.5	0.003	101.478	CPx_Puk_1-Aug-13	Peridotite
327	52.242	0.323	6.232	0.739	2.941	0.088	15.369	0.044	21.024	1.306	0.005	100.313	CPx_SKMX_1	Peridotite
328	52.318	0.41	6.281	0.813	3.058	0.085	15.431	0.044	20.987	1.225	0	100.652	CPx_SKMX_2	Peridotite
329	52.399	0.364	6.156	0.815	3.078	0.1	15.5	0.02	21.132	1.246	0	100.81	CPx_SKMX_3	Peridotite
330	52.335	0.315	6.016	0.855	3.153	0.125	15.445	0.056	21.31	1.239	0.001	100.85	CPx_SKMX_4	Peridotite
331	52.402	0.236	5.731	0.77	3.244	0.071	15.756	0.028	21.332	1.219	0.005	100.794	CPx_SKMX_5	Peridotite
332	52.137	0.267	5.715	0.765	3.144	0.118	15.62	0.048	21.15	1.177	0	100.141	CPx_SKMX_6	Peridotite
333	52.102	0.333	6.109	0.718	3.253	0.093	15.517	0.037	21.274	1.155	0	100.591	CPx_SKMX_7	Peridotite
334	51.459	0.387	6.134	0.7	2.932	0.106	15.561	0.041	21.012	1.23	0.002	99.564	CPx_SKMX_8	Peridotite
335	51.67	0.361	6.177	0.692	3.026	0.108	15.457	0.05	21.076	1.228	0.002	99.847	CPx_SKMX_9	Peridotite
336	51.786	0.319	6.014	0.708	3.121	0.058	15.596	0.055	21.119	1.212	0	99.988	CPx_SKMX_10	Peridotite
337	52.11	0.401	5.961	0.567	3.173	0.074	15.568	0	21.132	1.231	0.001	100.218	CPx_SKMX_11	Peridotite
338	52.064	0.352	5.893	0.665	3.236	0.08	15.56	0.027	21.074	1.231	0	100.182	CPx_SKMX_12	Peridotite
	SiO2	TiO2	Al2O3	Cr2O3	FeO	MnO	MgO	NiO	CaO	Na2O	K2O	Total
	51.941	0.974	2.737	0.421	5.369	0.121	14.985		22.054	0.693	0.004	99.299	tai_4_41	Sympl
	50.217	0.785	5.141	1.348	5.113	0.084	15.018		21.164	0.581	0.006	99.457	tai_8_1	Sympl
	47.226	2.723	6.39	0.689	4.837	0.09	13.136		22.056	0.89	0.006	98.043	tai_8_2	Sympl
	50.479	0.706	5.234	1.077	5.453	0.114	15.152		19.853	0.808	0.006	98.882	tai_8_3	Sympl
	52.095	0.225	6.018	1.012	2.799	0.084	16.122		20.197	1.209	0.001	99.762	tai_8_4	Sympl
	51.398	0.231	4.929	1.116	2.862	0.1	16.117		22.095	0.657	0	99.505	tai_8_39	Sympl
	49.61	1.126	4.487	1.029	5.714	0.097	14.899		21.707	0.431	0.001	99.101	tai_8_40	Sympl
	47.775	1.338	6.105	1.37	5.844	0.11	13.59		21.975	0.615	0	98.722	tai_8_42	Sympl
	49.477	1.756	4.218	0.655	5.696	0.15	13.799		22.004	0.833	0	98.588	tai_8_44	Sympl
	53.883	0.274	1.386	1.335	3.766	0.104	17.172		21.482	0.896	0	100.298	tai_8_46	Sympl
	48.788	1.34	5.42	0.696	6.618	0.12	13.067		21.536	0.833	0	98.418	tai-3-9	Sympl
	SiO2	TiO2	Al2O3	Cr2O3	FeO	MnO	MgO	NiO	CaO	Na2O	K2O	Total
	54.474	0.244	1.441	1.333	5.198	0.143	19.382		18.56	0.416	0	101.191	JeJuXe_2b_3	Sympl
	50.582	0.772	8.903	0.138	6.12	0.133	16.43		16.16	1.175	0.001	100.414	JeJuXe_2b_4	Sympl
	54.261	0.268	1.389	0.756	5.353	0.166	20.079		17.785	0.351	0.004	100.412	JeJuXe_2d_3	Sympl
	54.297	0.379	1.687	1.03	5.044	0.176	18.72		19.699	0.405	0.006	101.443	JeJuXe_2e_1	Sympl
	54.061	0.358	1.651	1.1	5.786	0.178	19.793		17.481	0.407	0.008	100.823	JeJuXe_2e_2	Sympl
	54.199	0.318	1.918	1.529	5.907	0.202	20.137		16.651	0.479	0.015	101.355	JeJuXe_2e_7	Sympl
349	41.242	6.173	12.944	0.054	8.019	0.096	9.282	0.029	21.823	0.831	0.209	100.702	CPx_Puk_React_1	Sympl
350	41.379	4.531	11.195	0.03	9.15	0.141	11.488	0.032	20.806	0.618	0.099	99.469	CPx_Puk_React_2	Sympl
353	39.466	7.035	13.233	0.146	8.517	0.133	9.134	0.043	22.376	0.685	0.02	100.788	CPx_Puk_React_5	Sympl
354	42.149	4.843	10.692	0.123	8.737	0.124	10.511	0.048	22.57	0.46	0.008	100.265	CPx_Puk_React_6	Sympl
355	49.562	1.824	4.459	0.493	5.831	0.082	14.164	0.048	23.534	0.495	0.009	100.501	CPx_TK_React_1	Sympl
356	44.664	4.412	9.088	0.058	7.664	0.111	11.275	0.006	23.102	0.589	0.011	100.98	CPx_TK_React_2	Sympl
357	43.624	5.28	9.548	0.158	7.462	0.135	10.788	0.027	22.993	0.673	0.006	100.694	CPx_TK_React_3	Sympl
358	43.733	4.86	10.415	0.157	7.436	0.127	10.647	0.027	23.029	0.659	0.006	101.096	CPx_TK_React_4	Sympl
359	44.834	4.405	8.272	0.084	7.62	0.108	11.659	0	22.901	0.593	0	100.476	CPx_TK_React_5	Sympl
360	43.929	4.706	8.77	0.109	8.123	0.099	11.062	0	23.494	0.613	0	100.905	CPx_TK_React_6	Sympl
362	44.106	5.1	8.874	0.094	7.714	0.128	11.015	0.02	23.069	0.565	0.005	100.69	CPx_TK_React_8	Sympl
363	42.474	5.419	10.22	0.3	8.312	0.106	10.161	0.037	23.134	0.566	0.001	100.73	CPx_TK_React_9	Sympl
364	41.088	5.577	12.422	0.287	8.235	0.146	10.401	0.04	22.319	0.6	0.014	101.129	CPx_TK_React_10	Sympl
365	41.348	5.684	11.36	0.106	9.449	0.118	9.621	0	22.509	0.547	0.015	100.757	CPx_TK_React_11	Sympl
No.	SiO2	TiO2	Al2O3	Cr2O3	FeO	MnO	MgO	NiO	CaO	Na2O	K2O	Total	Comment
306	49.473	2.245	4.796	0	7.089	0.144	12.863	0	22.97	0.721	0.012	100.313	CPX_GM_Tai_8_1	GM
307	49.926	1.978	4.176	0	7.429	0.169	12.98	0.011	22.838	0.741	0.003	100.251	CPX_GM_Tai_8_2	GM
308	48.216	2.596	5.158	0.031	8.062	0.161	13.059	0.002	22.367	0.579	0.003	100.234	CPX_GM_Tai_8_3	GM
309	49.984	2.2	4.538	0.041	7.11	0.157	12.922	0.02	22.863	0.722	0.01	100.567	CPX_GM_Tai_8_4	GM
310	44.66	4.17	8.773	0.022	7.87	0.144	10.869	0.022	22.357	1.02	0.007	99.914	CPX_GM_Tai_8_5	GM
311	50.371	1.956	5.142	0	6.755	0.15	13.03	0.02	22.392	1.078	0.014	100.908	CPX_GM_Tai_8_6	GM
313	48.084	2.615	5.652	0.003	7.877	0.179	12.454	0.05	22.581	0.696	0	100.191	CPX_GM_Tai_8_8	GM
314	45.211	3.934	8.295	0.05	7.915	0.125	11.347	0.027	22.676	0.759	0.004	100.343	CPX_GM_Tai_8_9	GM
No.	SiO2	TiO2	Al2O3	Cr2O3	FeO	MnO	MgO	NiO	CaO	Na2O	K2O	Total	Comment
339	42.836	5.02	10.61	0.11	8.712	0.094	10.544	0.068	22.64	0.524	0.008	101.166	CPx_Puk_GM_1	GM
340	47.918	2.596	5.676	0.062	8.197	0.113	13.15	0	22.278	0.321	0.007	100.318	CPx_Puk_GM_2	GM
341	45.065	3.305	8.75	0.106	8.191	0.104	11.638	0.014	22.45	0.516	0.007	100.146	CPx_Puk_GM_3	GM
342	43.197	4.071	10.522	0.049	8.489	0.081	10.998	0	22.202	0.514	0.002	100.125	CPx_Puk_GM_4	GM
343	49.473	1.992	4.864	0.306	7.02	0.105	14.004	0.014	22.597	0.386	0.009	100.77	CPx_Puk_GM_5	GM
344	47.366	2.72	6.24	0.103	8.136	0.122	12.92	0.012	22.409	0.374	0.016	100.418	CPx_Puk_GM_6	GM
345	46.94	2.698	5.374	0.155	7.737	0.112	13.356	0.06	20.939	0.332	0.031	97.734	CPx_Puk_GM_7	GM
346	41.992	5.155	10.716	0.048	8.846	0.086	10.177	0.01	22.645	0.502	0.005	100.182	CPx_Puk_GM_8	GM
347	48.389	2.405	5.599	0.06	7.868	0.125	13.368	0.021	22.347	0.392	0.003	100.577	CPx_Puk_GM_9	GM
348	47.348	2.557	5.784	0.132	8.506	0.138	13.042	0	21.794	0.381	0.003	99.685	CPx_Puk_GM_10
366	43.593	4.231	10.174	0.057	9.157	0.121	9.703	0.002	22.789	0.659	0.139	100.625	CPx_TK_GM_1	GM
367	31.418	10.153	10.163	0.012	27.668	0.333	7.268	0	16.156	0.64	0.097	103.908	CPx_TK_GM_2	GM
368	44.736	3.695	8.929	0	8.881	0.125	10.529	0.001	23.289	0.535	0.026	100.746	CPx_TK_GM_3	GM
369	45.343	3.199	8.967	0.034	9.764	0.187	9.624	0.013	22.808	0.66	0.111	100.71	CPx_TK_GM_4	GM
370	46.282	3.52	11.908	0.012	8.374	0.132	8.709	0.007	21.403	1.417	0.075	101.839	CPx_TK_GM_5	GM
371	46.046	2.612	8.534	0.009	10.454	0.157	9.722	0	22.647	0.731	0.11	101.022	CPx_TK_GM_6	GM
372	41.644	4.877	9.849	0	10.211	0.132	9.73	0.002	22.844	0.571	0.012	99.872	CPx_TK_GM_7	GM
373	44.883	3.735	9.426	0.02	9.087	0.159	10.271	0.005	22.724	0.59	0.093	100.993	CPx_TK_GM_8	GM
374	43.812	4.387	9.35	0.032	9.297	0.126	10.524	0.032	22.731	0.54	0.061	100.892	CPx_TK_GM_9	GM
375	33.603	3.195	8.216	0.008	7.38	0.104	7.293	0.04	29.71	0.67	0.151	90.37	CPx_TK_GM_10	GM

## Sheet: Ol-Raw
No.	SiO2	Al2O3	Cr2O3	FeO	MnO	MgO	CaO	NiO	Total	Comment
387	40.758	0.055	0.026	9.485	0.172	49.4	0.103	0.347	100.346	Ol-SanCarlos_1
387	41.031	0.035	0.024	9.581	0.125	49.407	0.075	0.405	100.683	Ol-SanCarlos_1
No.	SiO2	Al2O3	Cr2O3	FeO	MnO	MgO	CaO	NiO	Total	Comment
388	40.508	0.011	0.026	10.746	0.181	48.318	0.057	0.39	100.237	Ol_Tai_3_1	Peridotite
389	40.394	0	0.022	10.512	0.187	48.034	0.083	0.382	99.614	Ol_Tai_3_2	Peridotite
390	40.001	0.013	0.011	10.396	0.151	48.338	0.067	0.381	99.358	Ol_Tai_3_3	Peridotite
391	39.757	0.013	0.009	10.294	0.124	48.389	0.069	0.376	99.031	Ol_Tai_3_4	Peridotite
392	40.447	0.027	0.019	9.876	0.126	48.582	0.065	0.341	99.483	Ol_Tai_3_5	Peridotite
393	40.145	0.013	0.02	10.01	0.146	48.687	0.074	0.382	99.477	Ol_Tai_3_6	Peridotite
394	40.649	0.033	0.02	9.617	0.134	48.702	0.054	0.392	99.601	Ol_Tai_3_7	Peridotite
395	40.518	0.018	0.019	9.588	0.155	48.934	0.075	0.375	99.682	Ol_Tai_3_8	Peridotite
396	40.815	0	0.01	8.927	0.149	49.716	0.054	0.373	100.044	Ol_Tai_8_1	Peridotite
397	40.826	0.018	0.027	8.828	0.137	49.53	0.083	0.383	99.832	Ol_Tai_8_2	Peridotite
398	40.914	0.029	0.043	9.044	0.111	49.833	0.071	0.37	100.415	Ol_Tai_8_3	Peridotite
399	41.038	0.032	0.008	9.086	0.142	49.929	0.084	0.426	100.745	Ol_Tai_8_4	Peridotite
400	40.888	0	0	8.781	0.127	49.562	0.06	0.368	99.786	Ol_Tai_8_5	Peridotite
401	40.932	0.018	0.015	9.046	0.153	49.87	0.084	0.378	100.496	Ol_Tai_8_6	Peridotite
410	40.941	0.004	0.039	9.126	0.138	49.697	0.083	0.382	100.41	Ol_Tai_9_1	Peridotite
411	41.012	0.024	0	8.865	0.123	49.785	0.079	0.375	100.263	Ol_Tai_9_2	Peridotite
412	41.052	0.023	0.028	8.763	0.152	49.728	0.08	0.357	100.183	Ol_Tai_9_3	Peridotite
413	40.963	0.012	0.011	8.995	0.114	49.66	0.08	0.417	100.252	Ol_Tai_9_4	Peridotite
418	40.949	0.013	0	9.872	0.149	49.228	0.03	0.357	100.598	Ol_Sanri_5	Peridotite
419	40.929	0.02	0.001	9.664	0.138	49.043	0.057	0.372	100.224	Ol_Sanri_6	Peridotite
420	40.714	0.022	0.005	9.87	0.152	49.163	0.053	0.415	100.394	Ol_Sanri_7	Peridotite
422	40.978	0.01	0	9.709	0.157	49.482	0.06	0.389	100.785	Ol_Sanri_9
423	41.029	0.024	0.013	9.732	0.13	49.394	0.037	0.397	100.756	Ol_Sanri_10	Peridotite
424	41.156	0.029	0	9.757	0.137	49.549	0.037	0.395	101.06	Ol_Sanri_11	Peridotite
425	41.199	0.006	0.018	10.14	0.165	49.452	0.051	0.343	101.374	Ol_Sanri_12	Peridotite
426	39.947	0.053	0.072	15.308	0.233	44.295	0.218	0.287	100.413	Ol_GM_Sanri_1	GM	high Ni
427	40.229	0.045	0.037	15.084	0.179	45.037	0.203	0.279	101.093	Ol_GM_Sanri_2	GM	high Ni
428	39.782	0.045	0.004	15.845	0.182	44.173	0.186	0.243	100.46	Ol_GM_Sanri_3	GM	high Ni
429	39.649	0.048	0	16.954	0.212	42.868	0.233	0.24	100.204	Ol_GM_Sanri_4	GM	high Ni
No.	SiO2	Al2O3	Cr2O3	FeO	MnO	MgO	CaO	NiO	Total	Comment
465	38.042	0.046	0.001	24.291	0.386	36.801	0.287	0.148	100.002	Ol_Sinsanri_GM_1	GM
466	38.371	0.045	0.048	23.453	0.351	37.864	0.271	0.196	100.599	Ol_Sinsanri_GM_2	GM
467	38.15	0.037	0.019	24.678	0.369	37.097	0.341	0.105	100.796	Ol_Sinsanri_GM_3	GM
468	37.957	0.038	0.035	24.401	0.381	36.468	0.419	0.06	99.759	Ol_Sinsanri_GM_4	GM
469	38.354	0.057	0.009	24.103	0.338	36.829	0.346	0.074	100.11	Ol_Sinsanri_GM_5	GM
470	38.281	0.056	0.015	24.632	0.376	37.209	0.357	0.087	101.013	Ol_Sinsanri_GM_6	GM
402	37.116	0.033	0	27.76	0.549	33.704	0.276	0.073	99.511	Ol_Tai_8_7	GM
403	36.986	0.029	0	27.386	0.595	33.658	0.33	0.127	99.111	Ol_Tai_8_8	GM
404	37.165	0.033	0.006	27.257	0.61	33.932	0.31	0.089	99.402	Ol_Tai_8_9	GM
405	37.363	0.034	0	26.933	0.57	33.876	0.324	0.08	99.18	Ol_Tai_8_10	GM
406	37.184	0.023	0.023	27.472	0.559	33.798	0.298	0.103	99.46	Ol_Tai_8_11	GM
407	37.211	0.034	0	27.352	0.568	33.64	0.294	0.095	99.194	Ol_Tai_8_12	GM
408	37.223	0.043	0.022	27.595	0.534	33.572	0.316	0.098	99.403	Ol_Tai_8_13	GM
409	37.293	0.019	0.032	27.535	0.597	33.787	0.321	0.051	99.635	Ol_Tai_8_14	GM
No.	SiO2	Al2O3	Cr2O3	FeO	MnO	MgO	CaO	NiO	Total	Comment
460	38.132	0.012	0	24.878	0.453	37.162	0.095	0.136	100.868	Ol_Tai8_GM_1	GM
461	37.628	0.035	0.006	25.38	0.481	35.665	0.096	0.102	99.393	Ol_Tai8_GM_2	GM
462	38.605	0	0.024	18.755	0.24	40.957	0.133	0.234	98.948	Ol_Tai8_GM_3	GM	high Ni
463	38.93	0	0	18.967	0.221	41.635	0.129	0.256	100.138	Ol_Tai8_GM_4	GM	high Ni
464	37.472	0.003	0	24.701	0.457	36.583	0.172	0.178	99.566	Ol_Tai8_GM_5	GM
No.	SiO2	Al2O3	Cr2O3	FeO	MnO	MgO	CaO	NiO	Total	Comment
432	40.396	0	0.032	10.423	0.211	48.3	0.11	0.139	99.611	Ol_Tai3_React_1	Sympl.
433	40.608	0.011	0.062	10.637	0.203	48.136	0.119	0.163	99.939	Ol_Tai3_React_2	Sympl.
434	40.407	0.008	0.062	11.161	0.201	47.765	0.125	0.156	99.885	Ol_Tai3_React_3	Sympl.
435	40.377	0.003	0.041	11.494	0.224	47.375	0.136	0.171	99.821	Ol_Tai3_React_4	Sympl.
436	40.326	0	0.052	11.824	0.213	47.373	0.128	0.155	100.071	Ol_Tai3_React_5	Sympl.
437	40.012	0.028	0.042	12.545	0.267	46.344	0.168	0.159	99.565	Ol_Tai3_React_6	Sympl.
438	40.024	0.016	0.059	13.603	0.217	45.76	0.178	0.175	100.032	Ol_Tai3_React_7	Sympl.
439	39.859	0.003	0.028	14.269	0.238	44.811	0.207	0.157	99.572	Ol_Tai3_React_8	Sympl.
440	39.635	0.045	0.018	15.422	0.293	43.914	0.225	0.166	99.718	Ol_Tai3_React_9	Sympl.
441	39.484	0.015	0.034	15.441	0.276	43.894	0.206	0.133	99.483	Ol_Tai3_React_10	Sympl.
No.	SiO2	Al2O3	Cr2O3	FeO	MnO	MgO	CaO	NiO	Total	Comment
450	56.792	0.883	0.696	7.778	0.178	32.226	2.043	0.06	100.656	Ol_Sinsan_React_1	Sympl.
451	39.994	0.003	0.06	14.116	0.215	45.556	0.212	0.15	100.306	Ol_Sinsan_React_2	Sympl.
452	40.111	0.007	0.097	14.495	0.227	45.946	0.22	0.167	101.27	Ol_Sinsan_React_3	Sympl.
453	39.553	0.029	0.06	16.949	0.257	43.647	0.214	0.134	100.843	Ol_Sinsan_React_4	Sympl.
454	39.83	0.023	0.053	17.143	0.294	43.184	0.216	0.145	100.888	Ol_Sinsan_React_5	Sympl.
455	39.676	0.022	0.05	17.156	0.247	43.104	0.214	0.143	100.612	Ol_Sinsan_React_6	Sympl.
456	39.531	0.043	0.04	18.172	0.266	42.744	0.205	0.159	101.16	Ol_Sinsan_React_7	Sympl.
457	39.332	0.033	0.065	18.113	0.245	42.213	0.234	0.191	100.426	Ol_Sinsan_React_8	Sympl.
458	39.237	0.061	0.062	18.187	0.213	42.303	0.206	0.222	100.491	Ol_Sinsan_React_9	Sympl.
459	39.189	0.024	0.003	17.959	0.229	42.608	0.228	0.207	100.447	Ol_Sinsan_React_10	Sympl.
No.	SiO2	Al2O3	Cr2O3	FeO	MnO	MgO	CaO	NiO	Total	Comment
471	40.231	0.045	0.024	9.593	0.14	49.148	0.089	0.347	99.617	Ol-SanCarlos_1
No.	SiO2	Al2O3	Cr2O3	FeO	MnO	MgO	CaO	NiO	Total	Comment
472	41.545	0	0.015	8.195	0.108	51.335	0.04	0.373	101.611	Ol_Puk_1	Peridotite
473	41.433	0.021	0.018	8.102	0.109	51.326	0.037	0.317	101.363	Ol_Puk_2	Peridotite
474	41.035	0	0	8.274	0.138	50.73	0.037	0.408	100.622	Ol_Puk_3	Peridotite
475	41.23	0.023	0.022	8.256	0.126	50.66	0.049	0.424	100.79	Ol_Puk_4	Peridotite
476	41.433	0	0.018	8.156	0.127	50.874	0.05	0.353	101.011	Ol_Puk_5	Peridotite
477	41.245	0	0.125	8.19	0.14	51.015	0.028	0.393	101.136	Ol_Puk_6	Peridotite
478	41.325	0.001	0.025	8.166	0.116	50.914	0.052	0.372	100.971	Ol_Puk_7	Peridotite
479	41.193	0	0	8.173	0.121	50.799	0.043	0.393	100.722	Ol_Puk_8	Peridotite
480	41.452	0.011	0.024	8.252	0.104	50.964	0.042	0.417	101.266	Ol_Puk_9	Peridotite
481	41.628	0.008	0.005	8.086	0.127	51.384	0.042	0.398	101.678	Ol_Puk_10	Peridotite
482	41.199	0.019	0.019	8.674	0.124	50.852	0.036	0.408	101.331	Ol_Puk_11	Peridotite
483	41.036	0	0.016	8.573	0.13	50.64	0.14	0.392	100.927	Ol_Puk_12	Peridotite
No.	SiO2	Al2O3	Cr2O3	FeO	MnO	MgO	CaO	NiO	Total	Comment
485	39.213	0.025	0.033	19.701	0.278	41.077	0.376	0.142	100.845	Ol_Puk_React_2	Sympl.
486	39.521	0.034	0.053	18.431	0.232	42.112	0.364	0.144	100.891	Ol_Puk_React_3	Sympl.
487	39.218	0.042	0.009	19.705	0.253	41.378	0.36	0.143	101.108	Ol_Puk_React_4	Sympl.
488	39.497	0.037	0.038	17.392	0.249	42.865	0.329	0.183	100.59	Ol_Puk_React_5	Sympl.
489	39.434	0.034	0.037	18.7	0.278	41.777	0.343	0.146	100.749	Ol_Puk_React_6	Sympl.
490	39.447	0.031	0.034	18.669	0.222	41.865	0.348	0.136	100.752	Ol_Puk_React_7	Sympl.
491	39.382	0.039	0.049	18.055	0.219	42.797	0.367	0.128	101.036	Ol_Puk_React_8	Sympl.
492	39.316	0.032	0.015	18.705	0.21	41.64	0.341	0.162	100.421	Ol_Puk_React_9	Sympl.
493	39.451	0.061	0.005	19.48	0.253	41.111	0.411	0.142	100.914	Ol_Puk_React_10	Sympl.
495	39.564	0.059	0.022	18.046	0.221	42.64	0.371	0.141	101.064	Ol_Puk_GM_2	GM
496	39.507	0.052	0.027	18.71	0.229	42.052	0.342	0.149	101.068	Ol_Puk_GM_3	GM
497	39.352	0.025	0.006	17.72	0.202	42.233	0.324	0.156	100.018	Ol_Puk_GM_4	GM
498	39.45	0.029	0.009	18.782	0.244	41.935	0.353	0.163	100.965	Ol_Puk_GM_5	GM
500	39.358	0.042	0.012	18.661	0.143	42.691	0.229	0.181	101.317	Ol_Puk_GM_7	GM
502	41.468	0.012	0.005	8.951	0.12	50.441	0.067	0.413	101.477	Ol_TK_1	Peridotite
503	41.443	0.012	0.024	8.729	0.145	50.837	0.084	0.364	101.638	Ol_TK_2	Peridotite
504	41.171	0.021	0.016	8.765	0.111	50.557	0.067	0.366	101.074	Ol_TK_3	Peridotite
505	41.201	0	0.023	8.79	0.129	50.235	0.057	0.395	100.83	Ol_TK_4	Peridotite
506	41.451	0.014	0.042	8.934	0.129	50.877	0.075	0.354	101.876	Ol_TK_5	Peridotite
507	41.361	0.018	0.037	8.588	0.133	50.683	0.058	0.398	101.276	Ol_TK_6	Peridotite
508	41.453	0.014	0.028	8.566	0.108	50.369	0.053	0.387	100.978	Ol_TK_7	Peridotite
509	41.558	0.007	0.017	8.808	0.122	50.658	0.08	0.373	101.623	Ol_TK_8	Peridotite
510	41.418	0	0.038	8.658	0.111	50.657	0.07	0.433	101.385	Ol_TK_9	Peridotite
511	41.386	0.015	0.006	9.101	0.134	50.663	0.064	0.394	101.763	Ol_TK_10	Peridotite
512	40.133	0.045	0.034	15.254	0.254	44.679	0.444	0.149	100.992	Ol_TK_React_1	Sympl.
513	39.799	0.032	0.049	14.42	0.244	45.137	0.366	0.153	100.2	Ol_TK_React_2	Sympl.
514	40.378	0.011	0.056	15.21	0.257	44.917	0.35	0.132	101.311	Ol_TK_React_3	Sympl.
515	40.162	0.024	0.06	15.169	0.265	45.139	0.401	0.175	101.395	Ol_TK_React_4	Sympl.
516	40.189	0.054	0.055	16.014	0.264	44.312	0.409	0.196	101.493	Ol_TK_React_5	Sympl.
517	40.132	0.163	0.067	15.439	0.256	43.804	0.563	0.146	100.57	Ol_TK_React_6	Sympl.
518	39.98	0.013	0.048	15.892	0.254	44.592	0.446	0.169	101.394	Ol_TK_React_7	Sympl.
519	39.798	0	0.018	15.969	0.244	44.031	0.445	0.142	100.647	Ol_TK_React_8	Sympl.
520	40.038	0.038	0.041	16.193	0.268	44.077	0.401	0.148	101.204	Ol_TK_React_9	Sympl.
521	39.882	0.054	0.039	16.406	0.287	43.794	0.432	0.146	101.04	Ol_TK_React_10	Sympl.
522	39.61	0.092	0.031	22.465	0.335	39.897	0.504	0.066	103	Ol_TK_React_11	Sympl.
523	39.897	0.009	0.065	16.183	0.228	44.026	0.343	0.177	100.928	Ol_TK_React_12	Sympl.
524	39.762	0.025	0.016	17.021	0.263	43.446	0.48	0.141	101.154	Ol_TK_GM_1	GM
525	38.859	0.064	0.046	21.509	0.398	39.657	0.641	0.088	101.262	Ol_TK_GM_2	GM
526	39.774	0.038	0.018	17.477	0.29	43.172	0.507	0.121	101.397	Ol_TK_GM_3	GM
527	39.042	0.043	0.017	20.029	0.361	40.895	0.628	0.093	101.108	Ol_TK_GM_4	GM
528	38.856	0.05	0.012	21.177	0.378	39.895	0.757	0.065	101.19	Ol_TK_GM_5	GM
529	36.405	0.487	0.009	33.634	0.665	27.42	2.153	0.039	100.812	Ol_TK_GM_6	GM
533	39.653	0.036	0.019	17.539	0.274	43.264	0.509	0.115	101.409	Ol_TK_GM_10	GM
534	39.964	0.005	0.024	14.496	0.178	45.592	0.179	0.372	100.81	Ol_SK_1	Peridotite
535	40.088	0.014	0.055	14.459	0.19	45.404	0.164	0.31	100.684	Ol_SK_2	Peridotite
536	40.145	0.013	0.025	14.444	0.155	45.901	0.171	0.366	101.22	Ol_SK_3	Peridotite
537	40.01	0.058	0.05	14.163	0.198	45.606	0.195	0.351	100.631	Ol_SK_4	Peridotite
538	40.171	0.04	0.039	14.394	0.168	45.537	0.185	0.339	100.873	Ol_SK_5	Peridotite
539	40.149	0.042	0.018	14.517	0.176	45.663	0.176	0.329	101.07	Ol_SK_6	Peridotite
540	39.906	0.036	0.024	14.165	0.161	45.139	0.172	0.385	99.988	Ol_SK_7	Peridotite
541	39.989	0.068	0.058	14.154	0.152	45.739	0.17	0.322	100.652	Ol_SK_8	Peridotite
542	52.5	2.214	0.896	6.27	0.152	17.672	19.383	0.015	99.102	Ol_SK_React_1	Sympl.	low Ni
543	39.089	0.011	0.057	18.439	0.262	41.473	0.274	0.206	99.811	Ol_SK_React_2	Sympl.
544	38.714	0.008	0.048	20.719	0.308	40.019	0.272	0.198	100.286	Ol_SK_React_3	Sympl.
545	51.987	2.741	1.374	6.143	0.134	17.036	19.82	0	99.235	Ol_SK_React_4	Sympl.	low Ni
546	51.95	2.873	0.998	6.032	0.151	16.324	20.607	0.028	98.963	Ol_SK_React_5	Sympl.	low Ni
547	39.379	0.037	0.051	18.649	0.248	41.883	0.233	0.179	100.659	Ol_SK_React_6	Sympl.
548	38.958	0.018	0.041	21.308	0.267	39.576	0.249	0.17	100.587	Ol_SK_React_7	Sympl.
549	38.972	0.057	0.032	18.155	0.218	42.434	0.184	0.205	100.257	Ol_SK_React_8	Sympl.
550	38.414	0.033	0.024	21.552	0.294	39.233	0.225	0.179	99.954	Ol_SK_React_9	Sympl.
551	38.953	0.054	0.047	19.356	0.221	40.954	0.247	0.174	100.006	Ol_SK_React_10	Sympl.
552	39.054	0.063	0.02	18.913	0.209	41.641	0.163	0.161	100.224	Ol_SK_GM_1	GM
553	39.148	0.043	0.007	20.605	0.26	41.277	0.191	0.181	101.712	Ol_SK_GM_2	GM
555	38.968	0.031	0.025	18.373	0.222	41.788	0.197	0.256	99.86	Ol_SK_GM_4	GM	high Ni
556	38.427	0.041	0	22.236	0.299	38.437	0.263	0.147	99.85	Ol_SK_GM_5	GM
557	39.383	0.045	0.008	17.717	0.183	42.819	0.175	0.212	100.542	Ol_SK_GM_6	GM	high Ni
558	39.225	0.026	0.044	18.219	0.2	42.698	0.184	0.195	100.791	Ol_SK_GM_7	GM
559	38.998	0.037	0.033	19.187	0.222	41.634	0.18	0.207	100.498	Ol_SK_GM_8	GM	high Ni
560	39.244	0.044	0.042	17.754	0.209	42.258	0.189	0.198	99.938	Ol_SK_GM_9	GM
561	38.941	0.041	0.036	18.252	0.229	41.747	0.243	0.173	99.662	Ol_SK_GM_10	GM
563	37.453	0.025	0	26.992	0.425	34.55	0.322	0.075	99.842	Ol_SK_GM_11	GM
564	37.256	0.041	0	26.983	0.387	34.662	0.342	0.095	99.766	Ol_SK_GM_12	GM
565	37.258	0.042	0.001	27.574	0.446	33.784	0.442	0.08	99.627	Ol_SK_GM_13	GM
566	36.744	0.043	0	28.489	0.508	32.462	0.425	0.071	98.742	Ol_SK_GM_14	GM
567	37.08	0.061	0.006	27.497	0.457	33.185	0.444	0.071	98.801	Ol_SK_GM_15	GM
562	34.476	0.049	0.023	9.578	0.153	46.776	0.084	0.395	91.534	Ol-SanCarlos_1

## Sheet: Cr-Raw
No.	SiO2	TiO2	Al2O3	Cr2O3	FeO	MnO	MgO	NiO	Total	Comment
377	0	0.103	9.904	61.142	13.092	0.264	15.063	0.141	99.709	Chromite_117075_1
No.	SiO2	TiO2	Al2O3	Cr2O3	FeO	MnO	MgO	NiO	Total	Comment
378	0.05	0.032	53.363	14.765	11.134	0.132	20.348	0.318	100.142	Cr_Tai3_1
379	0.076	0.044	53.312	14.877	10.707	0.138	20.404	0.355	99.913	Cr_Tai3_2
380	0.013	0.013	52.924	14.752	11.134	0.131	20.157	0.353	99.477	Cr_Tai3_3
381	0.051	0.058	53.652	14.852	10.267	0.157	20.135	0.288	99.46	Cr_Tai3_4
382	0.027	0.04	52.989	14.952	10.975	0.115	20.156	0.322	99.576	Cr_Tai3_5
383	0.043	0.025	53.711	14.93	10.244	0.101	20.271	0.367	99.692	Cr_Tai3_6
384	0.076	0.08	51.209	17.678	10.216	0.134	20.473	0.32	100.186	Cr_Tai8_1
385	0.054	0.05	51.56	17.804	10.265	0.143	20.438	0.324	100.638	Cr_Tai8_2
386	0.017	0.129	51.316	17.664	10.361	0.117	20.522	0.321	100.447	Cr_Tai8_3
387	0.028	0.036	50.884	17.891	10.238	0.123	20.501	0.299	100	Cr_Tai9_1
388	0.041	0.079	51.039	17.475	10.399	0.104	20.451	0.276	99.864	Cr_Tai9_2
389	0.044	0.08	50.694	17.776	10.364	0.133	20.46	0.326	99.877	Cr_Tai9_3
390	0.047	0.047	50.84	17.788	10.155	0.131	20.438	0.305	99.751	Cr_Tai9_4
391	0.081	0.089	56.161	11.692	11.311	0.111	20.963	0.342	100.75	Cr_Sanri_1
392	0.087	0.113	56.191	11.677	11.13	0.111	20.96	0.377	100.646	Cr_Sanri_2
393	0.088	0.102	55.992	12.044	11.368	0.128	20.95	0.395	101.067	Cr_Sanri_3
394	0.088	0.091	56.302	11.341	11.171	0.114	20.993	0.339	100.439	Cr_Sanri_4
395	0.07	0.142	55.205	12.15	11.083	0.156	20.928	0.358	100.092	Cr_Sanri_5
396	0.086	0.124	55.829	12.133	11.437	0.097	20.808	0.358	100.872	Cr_Sanri_6
397	0.1	0.135	55.183	12.802	11.336	0.101	20.764	0.379	100.8	Cr_Sanri_7
398	0.103	0.063	55.531	11.864	11.227	0.127	21.005	0.383	100.303	Cr_Sanri_8
399	0.079	0.103	56.114	11.465	11.437	0.097	20.863	0.422	100.58	Cr_Sanri_9
400	0.073	0.076	55.68	12.169	11.058	0.119	21.007	0.366	100.548	Cr_Sanri_10
401	0.085	0.104	55.609	11.842	11.417	0.144	20.901	0.372	100.474	Cr_Sanri_11
402	0.091	0.099	56.053	11.436	11.065	0.097	20.997	0.369	100.207	Cr_Sanri_12
No.	SiO2	TiO2	Al2O3	Cr2O3	FeO	MnO	MgO	NiO	Total	Comment
403	0	0.096	10.024	61.265	13.171	0.259	15.234	0.18	100.229	Chromite_117075_1
No.	SiO2	TiO2	Al2O3	Cr2O3	FeO	MnO	MgO	NiO	Total	Comment
377	0	0.107	9.921	61.393	13.347	0.24	15.119	0.144	100.271	Chromite_117075_1
No.	SiO2	TiO2	Al2O3	Cr2O3	FeO	MnO	MgO	NiO	Total	Comment
378	0	0.072	19.523	50.252	16.312	0.323	14.214	0.119	100.815	Cr_Puk_1
379	0	0.066	18.756	50.833	16.321	0.294	14.072	0.139	100.481	Cr_Puk_2
380	0	0.055	18.669	51.315	16.435	0.276	14.153	0.135	101.038	Cr_Puk_3
381	0	0.06	18.939	51.164	16.571	0.311	13.923	0.157	101.125	Cr_Puk_4
382	0	0.033	20.227	49.616	16.356	0.276	14.419	0.116	101.043	Cr_Puk_5
383	0	0.05	20.296	49.586	16.366	0.31	14.433	0.128	101.169	Cr_Puk_6
384	0	0.048	19.879	50.034	16.3	0.287	14.376	0.128	101.052	Cr_Puk_7
385	0	0.029	19.809	50.199	16.172	0.261	14.434	0.109	101.013	Cr_Puk_8
386	0	0.052	20.033	49.506	16.339	0.293	14.216	0.148	100.587	Cr_Puk_9
387	0	0.053	20.139	50.052	16.224	0.322	14.169	0.132	101.091	Cr_Puk_10
388	0	0.024	13.441	54.827	18.681	0.329	13.116	0.107	100.525	Cr_TK_1
389	0.004	0.027	12.997	55.344	18.869	0.32	12.875	0.117	100.553	Cr_TK_2
390	0	0.024	13.282	54.944	19.232	0.297	12.963	0.148	100.89	Cr_TK_3
392	0.005	0.04	13.049	55.228	18.888	0.288	12.937	0.098	100.533	Cr_TK_5
393	0	0.015	13.638	54.651	19.086	0.324	12.891	0.122	100.727	Cr_TK_6
394	0	0.002	13.27	55.269	19.062	0.322	12.942	0.127	100.994	Cr_TK_7
395	0	0.036	13.11	55.383	19.057	0.305	12.748	0.124	100.763	Cr_TK_8
396	0.006	0.042	12.975	55.333	19.17	0.324	12.656	0.117	100.623	Cr_TK_9
397	0.004	0.071	55.196	11.914	13.061	0.131	20.359	0.361	101.097	Cr_SKMX_10
398	0.023	0.082	54.986	12.07	12.573	0.134	20.347	0.33	100.545	Cr_SKMX_11
399	0.037	0.108	54.522	12.003	12.319	0.139	20.303	0.369	99.8	Cr_SKMX_12
400	0.021	0.065	54.813	12.208	12.579	0.164	20.337	0.384	100.571	Cr_SKMX_13
401	0.019	0.043	54.498	12.281	12.452	0.132	20.616	0.36	100.401	Cr_SKMX_14
402	0.049	0.079	54.888	12.161	12.67	0.109	20.46	0.358	100.774	Cr_SKMX_15
403	0.057	0.065	55.413	11.208	12.262	0.112	20.529	0.306	99.952	Cr_SKMX_16
404	0.034	0.117	55.492	11.277	12.586	0.127	20.605	0.387	100.625	Cr_SKMX_17
405	0.035	0.098	55.663	11.26	12.663	0.114	20.373	0.359	100.565	Cr_SKMX_18
406	0.03	0.214	55.186	11.186	13.322	0.118	20.244	0.354	100.654	Cr_SKMX_19
407	0.036	0.077	55.595	11.413	12.762	0.125	20.443	0.377	100.828	Cr_SKMX_20

## Sheet: Glass-Raw
SiO2	TiO2	Al2O3	FeO	MnO	MgO	CaO	Na2O	K2O	Cr2O3	Total
66.167	0.951	16.576	2.218	0.006	0.893	1.903	4.705	5.441		98.86	JeJuXe_new_1
66.131	0.972	16.437	2.434	0.048	1.046	1.795	4.589	5.445		98.897	JeJuXe_new_2
65.662	0.888	16.695	2.497	0.019	1.083	1.848	4.742	5.442		98.876	JeJuXe_new_3
68.512	0.784	16.177	2.017	0.012	0.994	1.639	4.724	5.506		100.365	JeJuXe_new_4
59.793	2.036	17.631	4.454	0.056	1.632	4.819	4.673	4.32		99.414	JeJuXe_new_5
59.534	2.017	17.527	4.565	0.054	1.654	4.858	4.628	4.324		99.161	JeJuXe_new_6
60.673	2.075	17.824	4.028	0.055	1.331	4.972	4.176	4.398		99.532	JeJuXe_new_7
59.503	2.17	17.646	4.31	0.078	1.533	5.036	4.64	4.254		99.17	JeJuXe_new_8
59.927	2.124	17.582	3.925	0.044	1.396	5.081	4.619	4.377		99.075	JeJuXe_new_9
59.031	2.3	17.41	4.722	0.118	1.707	5.235	4.512	4.251		99.286	JeJuXe_new_10
58.66	2.307	17.216	4.694	0.088	1.805	5.14	4.503	4.252		98.665	JeJuXe_new_11
58.048	2.311	17.113	4.783	0.103	1.779	5.276	4.41	4.236		98.059	JeJuXe_new_12
58.212	2.495	17.005	4.993	0.087	1.678	5.228	4.54	4.449		98.687	JeJuXe_new_13
66.772	0.921	16.502	2.412	0.041	1.174	2.524	4.572	5.272		100.19	JeJuXe_new_14
63.581	0.628	16.135	2.715	0.06	4.372	1.428	4.868	5.506		99.293	JeJuXe_new2_1
64.034	0.749	18.047	2.333	0.037	1.223	2.682	5.042	5.623		99.77	JeJuXe_new2_2
62.644	0.88	18.394	2.72	0.048	1.231	2.969	5.033	5.532		99.451	JeJuXe_new2_3
62.321	0.986	18.659	2.721	0.048	1.246	3.123	5.094	5.489		99.687	JeJuXe_new2_4
60.187	0.718	16.441	3.806	0.048	6.786	2.034	4.812	4.884		99.716	JeJuXe_new2_5
62.187	1.095	18.487	2.955	0.052	1.316	3.345	5.044	5.48		99.961	JeJuXe_new2_6
65.606	0.69	17.661	2.064	0.032	1.067	2.229	4.992	5.75		100.091	JeJuXe_new2_7
64.163	0.798	18.255	2.296	0.04	1.13	2.791	5.068	5.543		100.084	JeJuXe_new2_8
62.624	1.019	18.346	3.044	0.045	1.329	3.144	4.983	5.483		100.017	JeJuXe_new2_9
64.037	0.716	18.056	2.479	0.049	1.318	2.687	5.016	5.556		99.914	JeJuXe_new2_10
63.863	0.718	18.374	2.507	0.03	1.202	2.929	5.118	5.4		100.141	JeJuXe_new2_11
63.9	0.684	18.222	2.453	0.045	1.273	2.544	4.985	5.538		99.644	JeJuXe_new2_12
63.743	0.692	18.395	2.59	0.039	1.377	2.787	5.101	5.419		100.143	JeJuXe_new2_13
66.325	0.47	17.466	2.084	0.036	1.067	2.056	4.902	5.731		100.137	JeJuXe_new2_14
SiO2	TiO2	Al2O3	FeO	MnO	MgO	CaO	Na2O	K2O	Cr2O3	Total
69.615	0.059	20.568	0.5	0.021	0.063	0.244	5.591	6.674	0	103.335	tai4-1-5	glass	Sympl
66.832	0.112	20.299	0.397	0	0.048	0.563	7.485	5.1	0	100.836	tai4-1-9	glass	Sympl
66.094	0.17	20.289	0.498	0	0.013	0.51	6.173	6.628	0.006	100.381	tai4-1-10	glass	Sympl
61.474	0.113	26.331	0.216	0.022	0.007	0.199	4.988	0.034	0	93.384	tai4-1-17	glass	basalt
67.157	0.077	19.324	0.559	0.01	0.245	0.045	5.04	7.23	0	99.687	tai_4-20	glass	Sympl
65.425	0.133	20.431	0.372	0	0.016	0.777	6.388	5.437	0	98.979	tai_4-21	glass	Sympl
68.281	0.135	21.121	0.462	0.02	0	0.747	3.713	4.412	0.035	98.926	tai_4-22	glass	Sympl
65.675	0.184	20.477	0.397	0	0.044	0.82	6.105	5.688	0	99.39	tai_4-23	glass	Sympl
65.451	0.193	20.198	0.419	0	0.064	0.607	6.334	5.741	0	99.007	tai_4-24	glass	Sympl
65.36	0.09	19.156	0.808	0.006	1.977	0.16	6.438	5.665	0.01	99.67	tai_4-25	glass	Sympl
65.875	0.081	19.871	0.418	0.033	0.016	0.262	5.979	6.465	0	99	tai_4-26	glass	Sympl
66.704	0.067	19.266	0.361	0	0.04	0.065	5.166	7.706	0	99.375	tai_4-27	glass	Sympl
66.758	0.056	19.324	0.365	0.01	0.036	0.044	6.301	6.334	0.025	99.253	tai_4-28	glass	Sympl
58.415	0.139	26.348	0.892	0.023	3.619	7.586	5.2	0.335	0.273	102.83	tai_4_47	glass	Sympl
65.652	0.192	23.026	0.195	0.001	0.008	2.634	7.672	2.866	0.041	102.287	tai_4_49	glass	Sympl
53.367	0.159	30.598	0.929	0.014	0.06	11.595	4.511	0.23	0	101.463	tai_10_19	glass	Sympl
54.946	0.15	29.619	0.977	0.01	0.035	10.656	4.957	0.263	0.035	101.648	tai_10_20	glass	Sympl
53.244	0.182	29.98	0.946	0	0.046	11.197	4.918	0.227	0	100.74	tai_10_24	glass	Sympl
66.769	0.128	19.729	0.56	0	0.021	0.146	5.608	7.22	0.019	100.2	tai_10_31	glass	Sympl
52.039	0.109	31.456	0.856	0.003	0.054	12.706	3.882	0.145	0.069	101.319	tai_10_40	glass	Sympl
52.174	0.132	31.383	0.807	0	0.045	12.737	3.74	0.156	0.097	101.271	tai_10_41	glass	Sympl
53.801	0.128	30.391	1.023	0.002	0.058	11.25	4.653	0.192	0.031	101.529	tai_10_44	glass	Sympl
59.153	0.094	26.144	0.725	0.02	1.34	6.351	6.369	0.707	0.039	100.942	tai_8_5	glass	Sympl
56.913	0.136	28.27	0.249	0.025	0.05	8.875	6.003	0.321	0	100.842	tai_8_6	glass	Sympl
57.925	0.198	27.732	0.518	0.003	0.175	7.657	6.444	0.526	0.452	101.63	tai_8_21	glass	Sympl
56.626	0.15	28.394	0.408	0.009	0.09	8.716	6.081	0.407	0.163	101.044	tai_8_24	glass	Sympl
63.175	0.274	24.701	0.17	0.036	0.03	4.419	7.591	1.277	0.088	101.761	tai_8_25	glass	Sympl
68.259	0.242	19.737	0.416	0.008	0.084	0.044	4.806	7.719	0.01	101.325	tai_8_29	glass	Sympl
67.359	0.018	19.162	0.389	0.04	0.067	0.036	5.395	7.156	0.021	99.643	tai-3-4	glass	Sympl
66.406	0.055	19.609	0.464	0	0.045	0.163	5.463	7.171	0.042	99.418	tai-3-5	glass	Sympl
65.488	0.141	20.002	0.392	0.003	0.145	0.686	5.172	6.784	0	98.813	tai-3-10	glass	Sympl
64.029	0.096	18.333	0.835	0	2.474	1.838	5.346	5.532	0.033	98.516	tai-3-14	glass	Sympl?
66.024	0.13	19.671	0.46	0	0.449	1.02	6.078	5.657	0.009	99.498	tai-3-14	glass	Sympl?
66.269	0.187	19.026	0.61	0.001	0.035	0.097	5.13	9.183		100.538	Tai-10-1	glass	Sympl
65.77	0.247	18.643	0.677	0.021	0.224	0.075	5.136	9.058		99.851	Tai-10-2	glass	Sympl
66.68	0.215	19.091	0.536	0.01	0.043	0.183	5.599	8.276		100.633	Tai-10-3	glass	Sympl
66.676	0.238	18.697	0.559	0.021	0.078	0.035	4.554	9.756		100.614	Tai-10-6	glass	Sympl
68.305	0.246	19.428	0.654	0	0.08	0.171	5.752	7.398		102.034	Tai-10-7	glass	Sympl
61.44	0.185	16.212	2.699	0.053	7.159	0.267	4.53	6.71		99.255	Tai-10-8	glass	Sympl
66.427	0.212	18.932	0.587	0.003	0.486	0.305	5.358	8.068		100.378	Tai-10-9	glass	Sympl
66.332	0.212	18.843	0.755	0	0.05	0.186	4.749	9.377		100.504	Tai-10-10	glass	Sympl
62.702	0.277	16.435	2.146	0.029	5.346	0.144	4.397	7.744		99.22	Tai-10-11	glass	Sympl
63.736	0.15	23.406	0.463	0.025	0.072	4.198	7.436	1.085		100.571	Tai-10-12	glass	Sympl
65.516	0.272	22.113	0.578	0.023	0.249	3	7.293	1.729		100.773	Tai-10-13	glass	Sympl
64.349	0.217	21.238	0.626	0	0.031	2.22	6.414	4.801		99.896	Tai-10-14	glass	Sympl
61.574	0.211	23.371	0.71	0	0.028	4.324	6.812	2.047		99.077	Tai-10-15	glass	Sympl
54.634	0.165	28.18	0.883	0.015	0.044	10.23	4.867	0.37		99.388	Tai-10-16	glass	Sympl
52.612	0.193	29.587	1.046	0	0.047	11.943	3.907	0.239		99.574	Tai-10-17	glass	Sympl
60.801	0.219	24.051	0.71	0	0.247	5.227	6.887	1.274		99.416	Tai-10-18	glass	Sympl
64.24	0.164	17.614	1.009	0.015	2.385	0.123	4.722	7.754		98.026	Tai-10-19	glass	Sympl
65.017	0.167	17.548	1.01	0.035	2.594	0.185	4.589	8.583		99.728	Tai-10-20	glass	Sympl
67.264	0.135	18.36	0.761	0	1.077	0.076	4.305	8.862		100.84	Tai-10-21	glass	Sympl
65.52	0.176	17.51	0.793	0	1.331	1.433	4.479	8.644		99.886	Tai-10-22	glass	Sympl
65.357	0.363	19.613	0.681	0.016	0.07	0.56	5.028	8.695		100.383	Tai-10-23	glass	Sympl
64.456	0.342	20.338	0.683	0.018	0.055	1.078	5.697	6.638		99.305	Tai-10-24	glass	Sympl
65.429	0.322	20.044	0.596	0	0.031	0.883	5.828	7.046		100.179	Tai-10-25	glass	Sympl
62.985	0.128	22.884	0.752	0.016	0.147	3.842	7.107	2.098		99.959	Tai-10-26	glass	Sympl
52.019	0.18	29.974	1.158	0.013	0.047	12.013	4.056	0.224		99.684	Tai-10-27	glass	Sympl
SiO2	TiO2	Al2O3	FeO	MnO	MgO	CaO	Na2O	K2O	Cr2O3	Total
62.145	1.394	17.325	3.513	0.011	1.43	2.471	4.938	6.37		99.597	Sk26_5	glass
58.965	1.955	18.209	4.657	0.066	1.452	2.489	4.924	6.393		99.11	Sk26_6	glass
59.929	2.052	18.373	4.84	0.057	1.453	2.602	4.597	6.208		100.111	Sk26_7	glass
58.212	2.253	18.027	4.899	0.043	1.842	3.668	4.385	5.909		99.238	Sk26_8	glass
56.553	2.346	17.867	5.045	0.047	2.237	4.345	4.473	5.536		98.449	Sk26_9	glass
57.794	2.271	18.352	4.623	0.057	1.729	2.903	4.905	6.201		98.835	Sk26_10	glass
64.686	1.046	17.355	2.464	0.022	1.353	2.328	4.147	6.457		99.858	Sk26_11	glass
55.498	2.968	17.416	6.982	0.054	1.999	4.58	4.029	5.426		98.952	Sk26_12	glass
61.446	1.74	18.253	4.019	0.049	1.419	2.538	4.33	6.305		100.099	Sk26_13	glass
59.067	2.065	18.637	4.884	0.075	1.699	2.881	4.597	6.205		100.11	Sk26_14	glass
55.705	2.535	15.203	10.006	0.094	1.793	4.316	3.601	5.319		98.572	Sk26_15	glass
63.132	1.237	16.815	1.961	0.014	1.731	2.275	4.644	6.345		98.154	SK26_22	glass
64.023	1.081	17.162	2.459	0.018	0.868	1.57	4.811	6.716		98.708	SK26_23	glass
55.797	2.938	17.971	6.169	0.083	1.722	3.977	4.476	5.578		98.711	SK26_24	glass
55.584	3.264	17.741	6.74	0.076	1.356	3.232	4.386	5.793		98.172	SK26_25	glass
53.701	3.914	14.32	9.059	0.097	2.519	5.867	3.343	4.896		97.716	SK26_26	glass
54.023	3.809	14.365	8.976	0.137	2.462	5.89	3.326	4.864		97.852	SK26_27	glass
54.02	3.136	16.35	8.253	0.07	2.265	5.797	3.789	4.927		98.607	SK26_28	glass
SiO2	TiO2	Al2O3	FeO	MnO	MgO	CaO	Na2O	K2O	Cr2O3	Total
49.861	0.885	22.822	2.862	0.049	1.019	5.239	5.379	3.624		91.74	TK4E_1	glass
52.743	1.616	24.384	3.631	0.055	0.797	3.525	5.613	3.718		96.082	TK4E_2	glass
48.982	1.168	22.908	4.352	0.094	0.835	4.534	5.531	3.633		92.037	TK4E_3	glass
48.575	0.972	20.603	8.817	0.182	4.702	4.679	5.241	2.976		96.747	TK4E_4	glass
49.441	0.846	22.934	6.999	0.114	0.692	4.845	5.435	3.492		94.798	TK4E_5	glass
50.743	0.759	23.535	6.717	0.14	0.462	3.527	5.426	3.593		94.902	TK4E_6	glass
56.231	1.125	25.761	2.825	0.066	0.845	4.005	5.034	3.567		99.459	TK4E_7	glass
53.944	1.587	23.38	4.407	0.082	3.422	2.81	4.58	2.895		97.107	TK4E_8	glass
50.968	1.484	21.685	6.219	0.116	4.371	2.922	5.342	3.142		96.249	TK4E_9	glass
54.289	1.668	25.308	3.478	0.056	0.752	3.25	4.206	3.273		96.28	TK4E_10	glass
53.255	1.881	24.419	4.242	0.092	0.852	4.08	5.139	3.538		97.498	TK4E_11	glass
53.869	0.694	24.453	3.67	0.07	0.549	5.266	5.05	3.361		96.982	TK4E_12	glass
49.697	1.428	22.309	5.865	0.12	0.896	6.26	4.809	3.286		94.67	TK4E_13	glass
52.446	0.858	23.594	6.715	0.119	0.521	3.714	5.32	3.292		96.579	TK4E_14	glass
SiO2	TiO2	Al2O3	FeO	MnO	MgO	CaO	Na2O	K2O		Total	Comment
50.796	0.029	30.864	0.343	0.017	0.142	13.58	3.502	0.123		99.396	Lab-1
48.314	2.546	19.705	7.506	0.124	1.426	9.172	2.563	2.264		93.62	Puk_glass-1
48.45	2.969	20.219	7.929	0.136	1.311	9.709	2.857	2.426		96.006	Puk_glass-2
48.493	2.745	20.175	7.468	0.109	1.482	9.268	2.908	2.467		95.115	Puk_glass-3
48.342	2.813	19.718	7.885	0.127	1.44	9.395	2.52	2.292		94.532	Puk_glass-4
49.159	2.926	20.429	8.09	0.118	1.688	9.342	2.787	2.539		97.078	Puk_glass-5
47.012	2.475	18.155	8.939	0.16	4.592	7.929	3.136	2.153		94.551	Puk_glass-6
46.926	3.093	19.797	7.589	0.125	1.77	10.038	3.147	2.423		94.908	Puk_glass-7
49.303	3.167	20.233	7.819	0.151	1.758	9.78	3.305	2.559		98.075	Puk_glass-8
47.922	3.56	19.466	8.415	0.119	1.5	10.887	2.974	2.458		97.301	Puk_glass-9
47.603	3.597	19.777	8.115	0.152	1.406	10.67	2.912	2.489		96.721	Puk_glass-10
48.379	3.037	19.398	7.913	0.162	1.925	10.251	3.629	2.498		97.192	Puk_glass-11
50.264	2.63	20.107	7.612	0.127	1.469	9.626	3.528	2.547		97.91	Puk_glass-12
48.53	3.177	19.563	8.025	0.127	2.366	10.468	2.799	2.177		97.232	Puk_glass-13
49.556	2.885	19.271	8.035	0.127	1.236	9.259	3.607	2.861		96.837	Puk_glass-14
49.112	2.331	19.778	8.29	0.128	1.489	8.374	3.504	2.784		95.79	Puk_glass-15
